# Supplementary material
Source: PubMed Central journal article supplement (PMC3433678)

Figure 2A

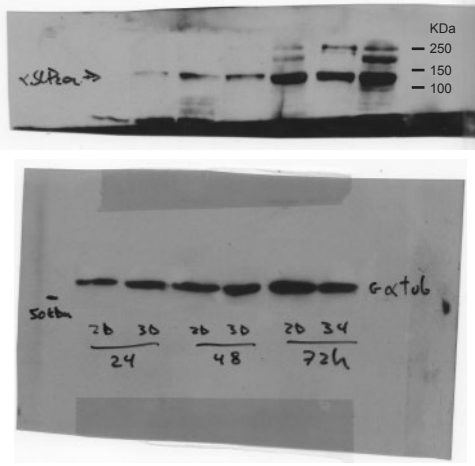

Figure 2C

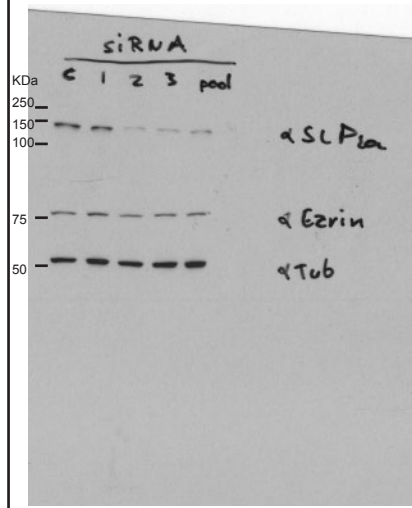

Figure 2F

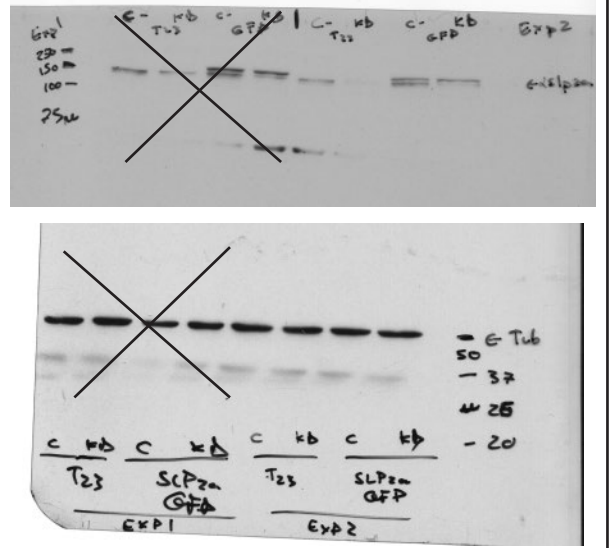

Figure 3C

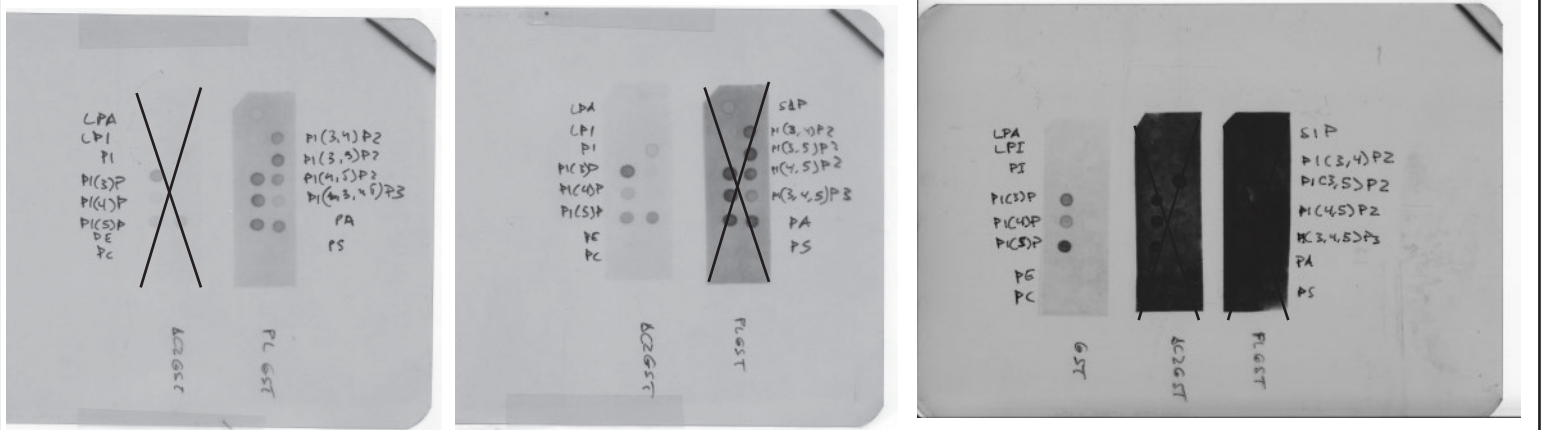

Figure 4A

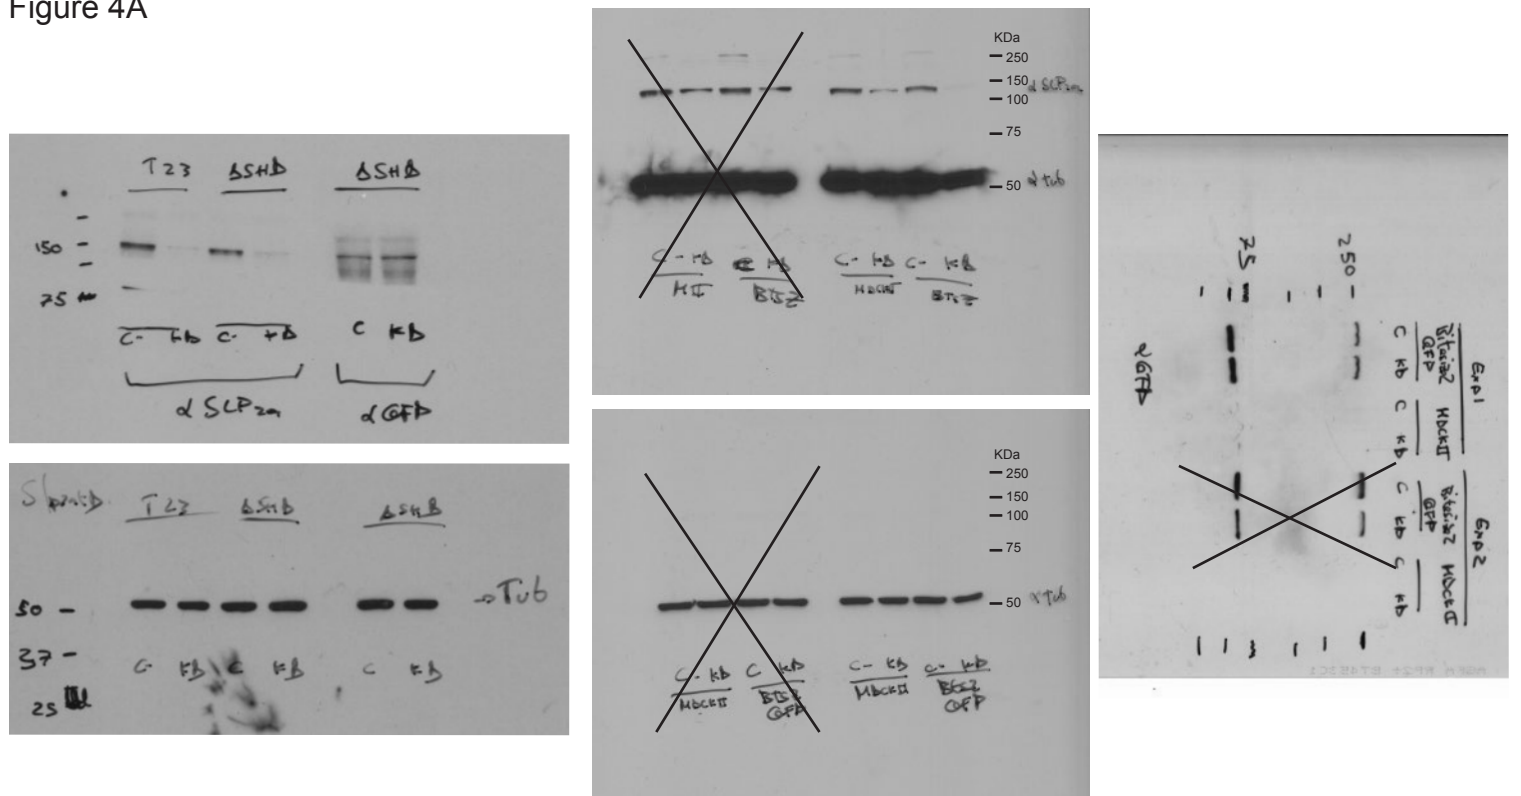

Figure 4G

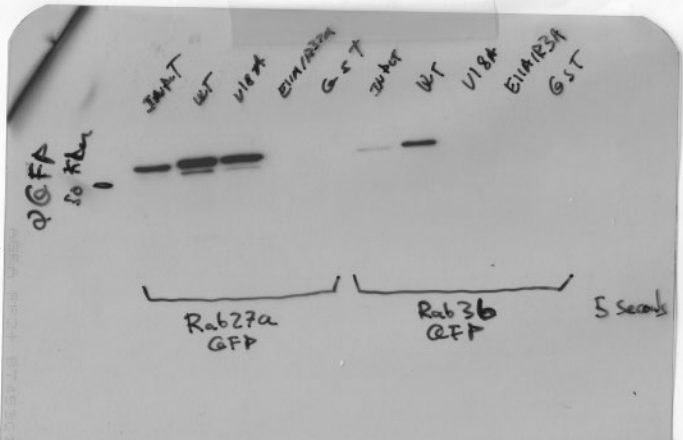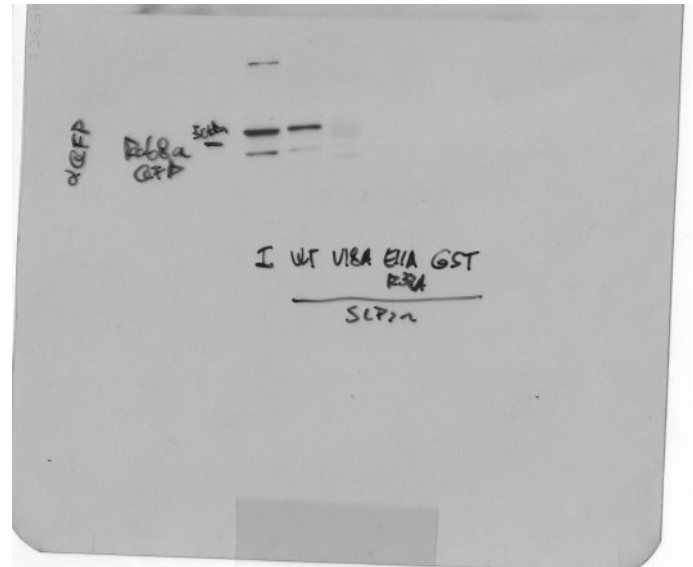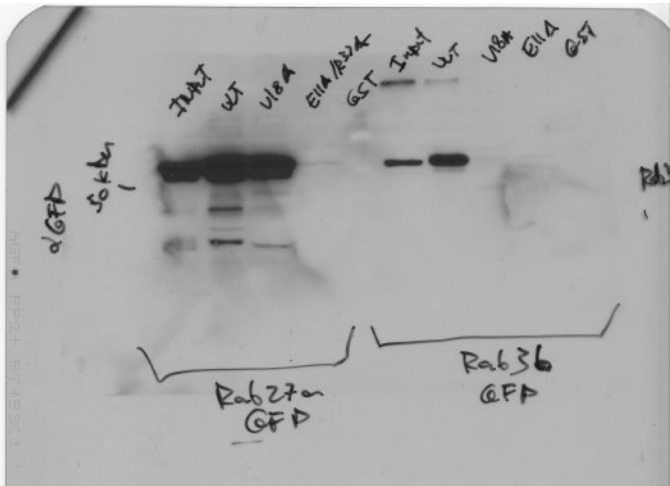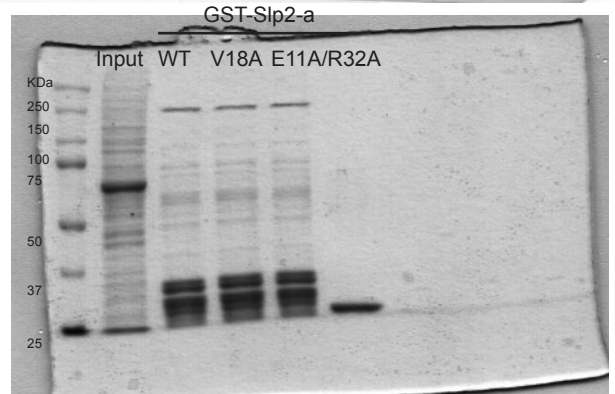

Figure 5G

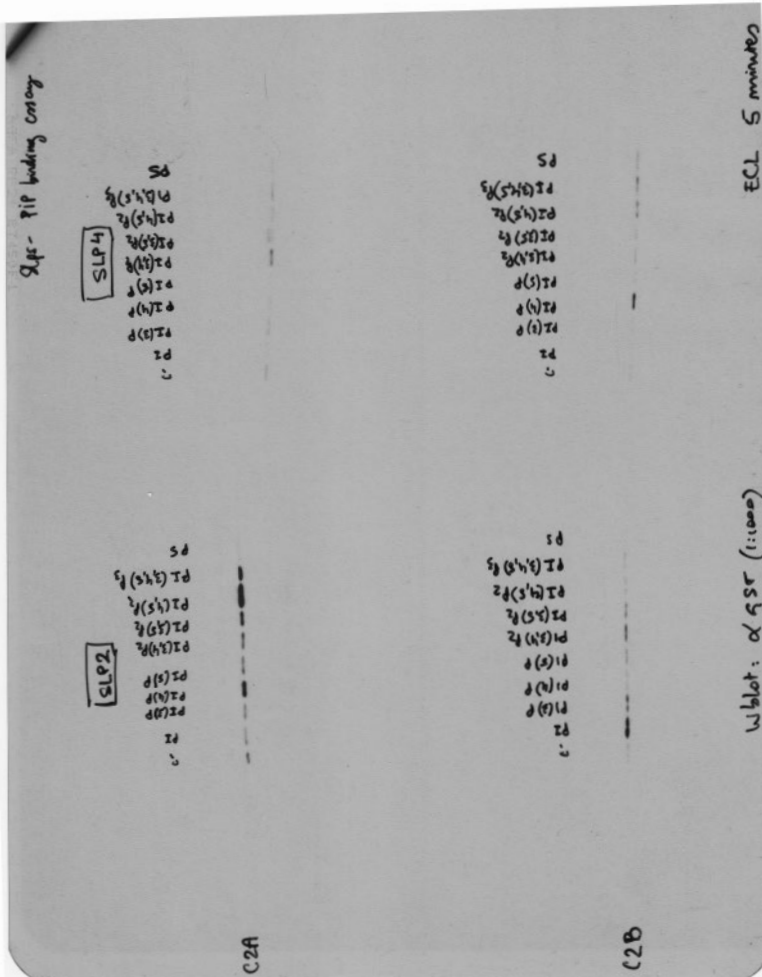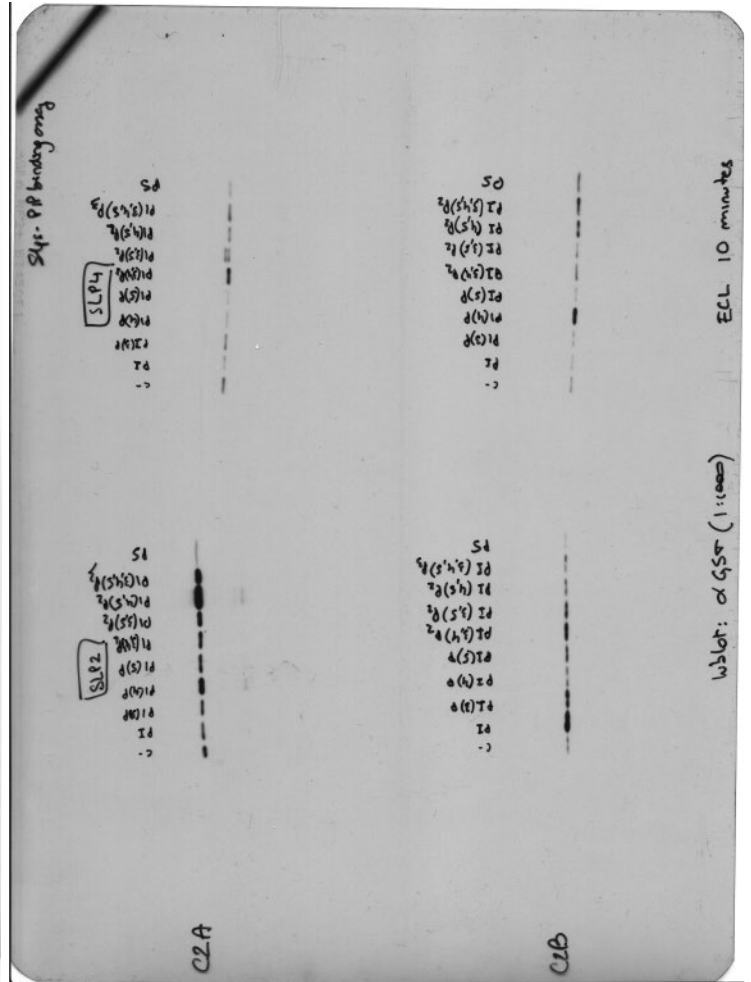

Figure 6A

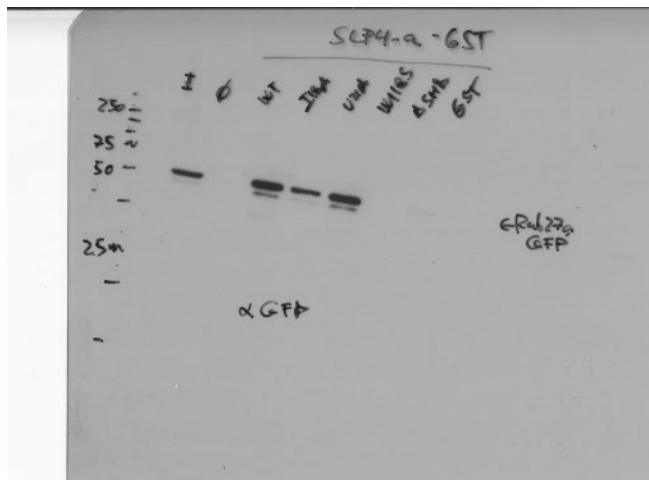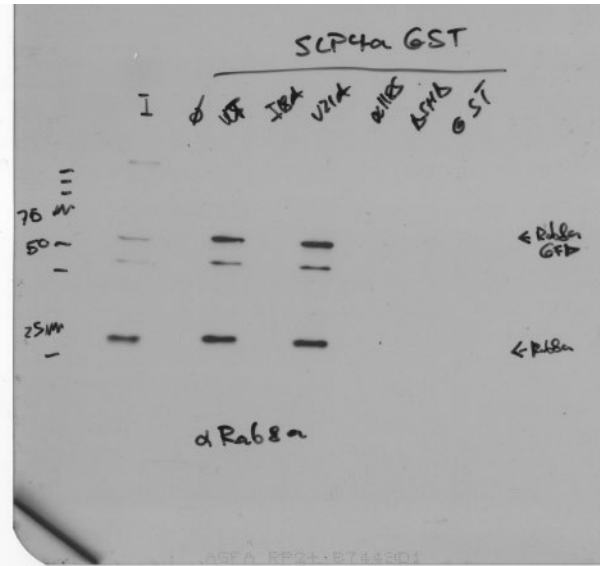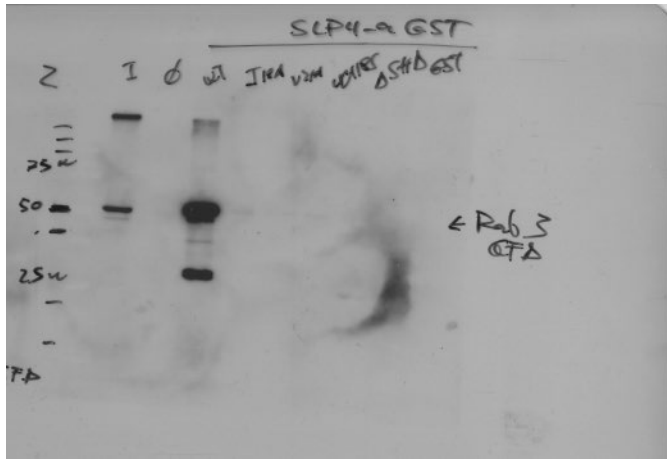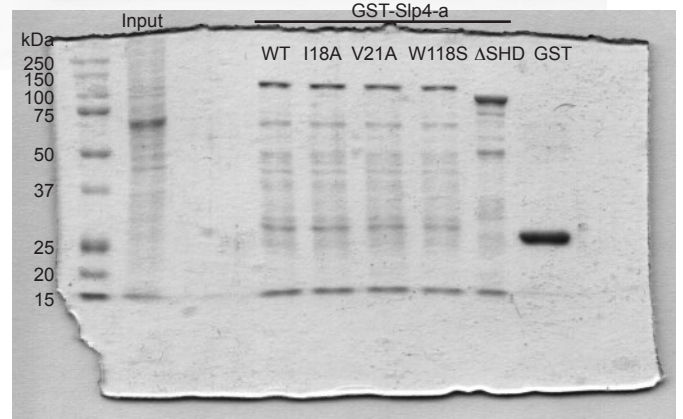

Figure 6D

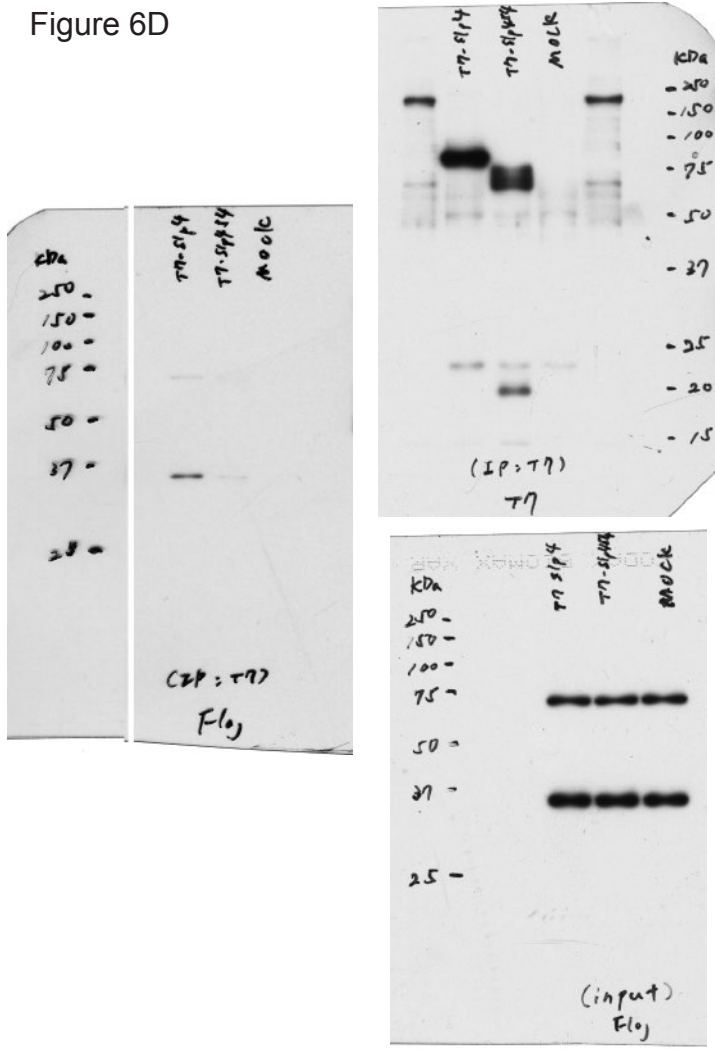

Figure 6J

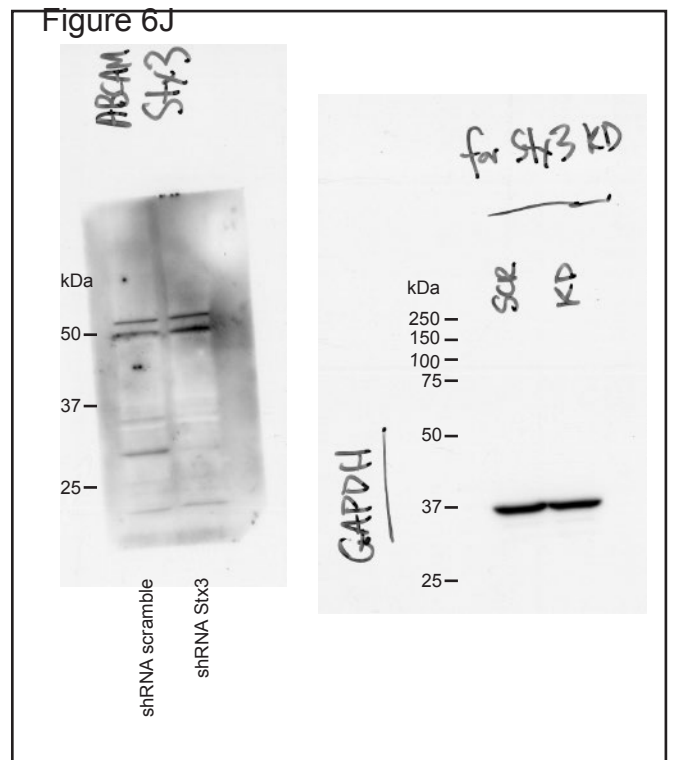

Figure S5A

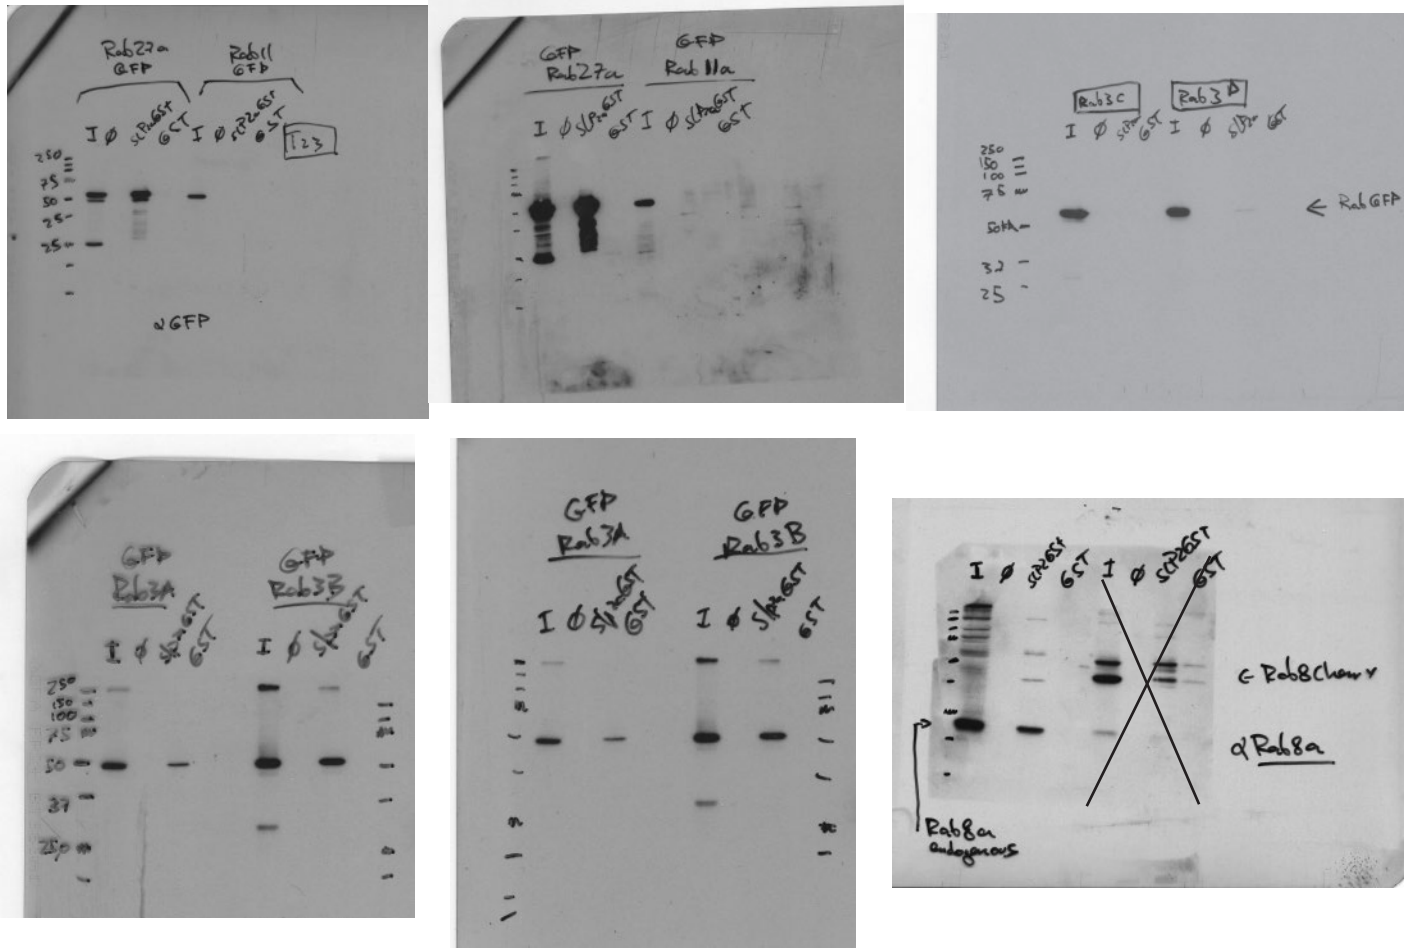

Figure S5B

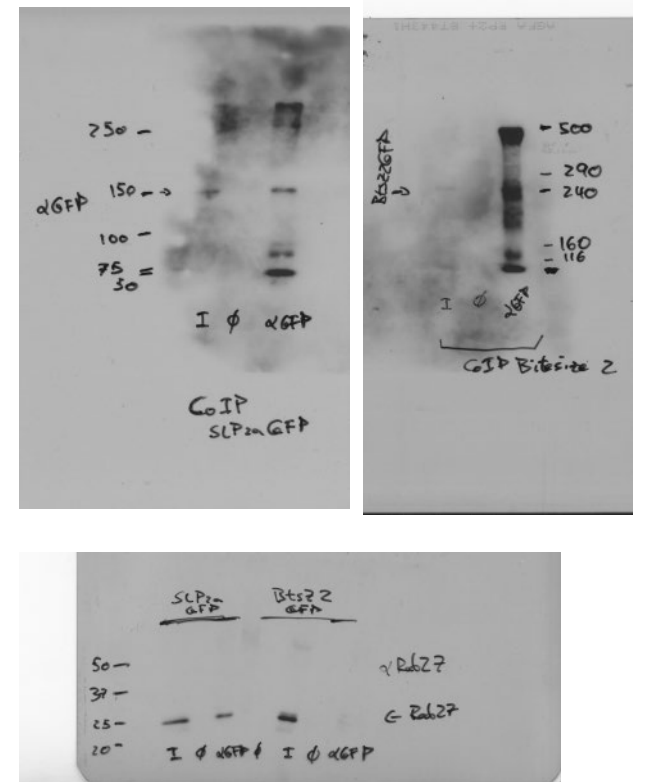

Figure S5F

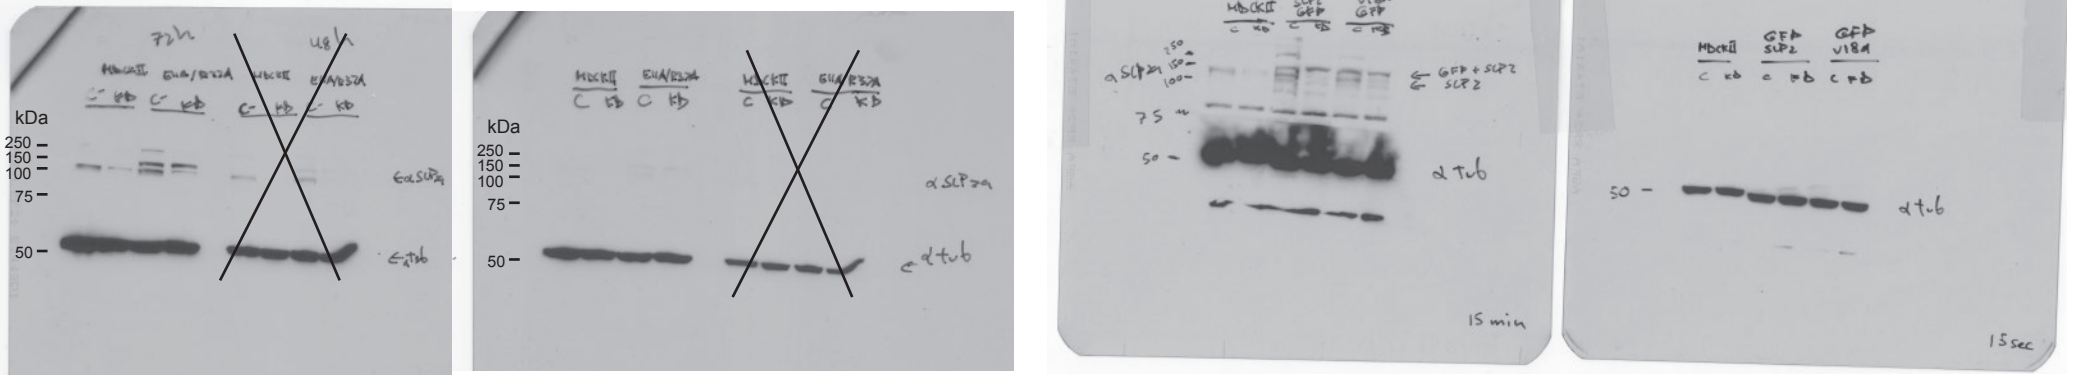

Figure S6C

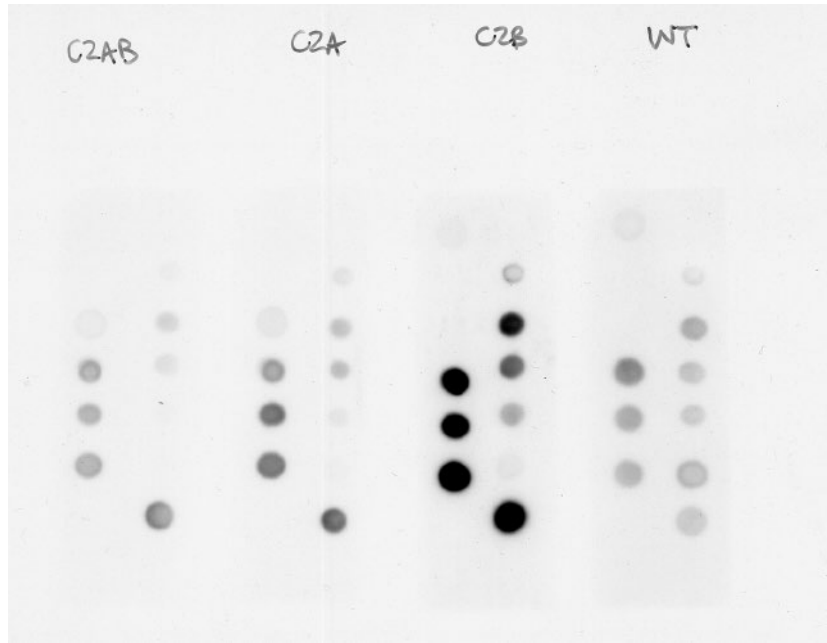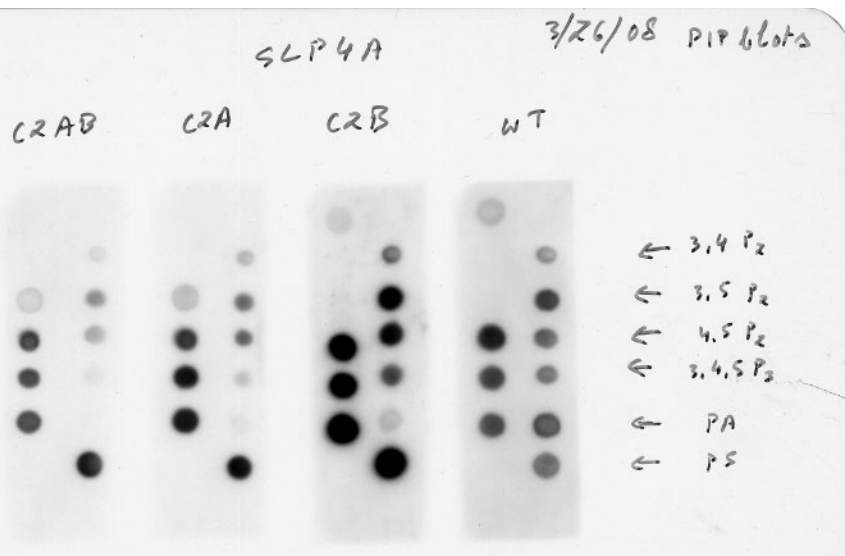

Figure S6H

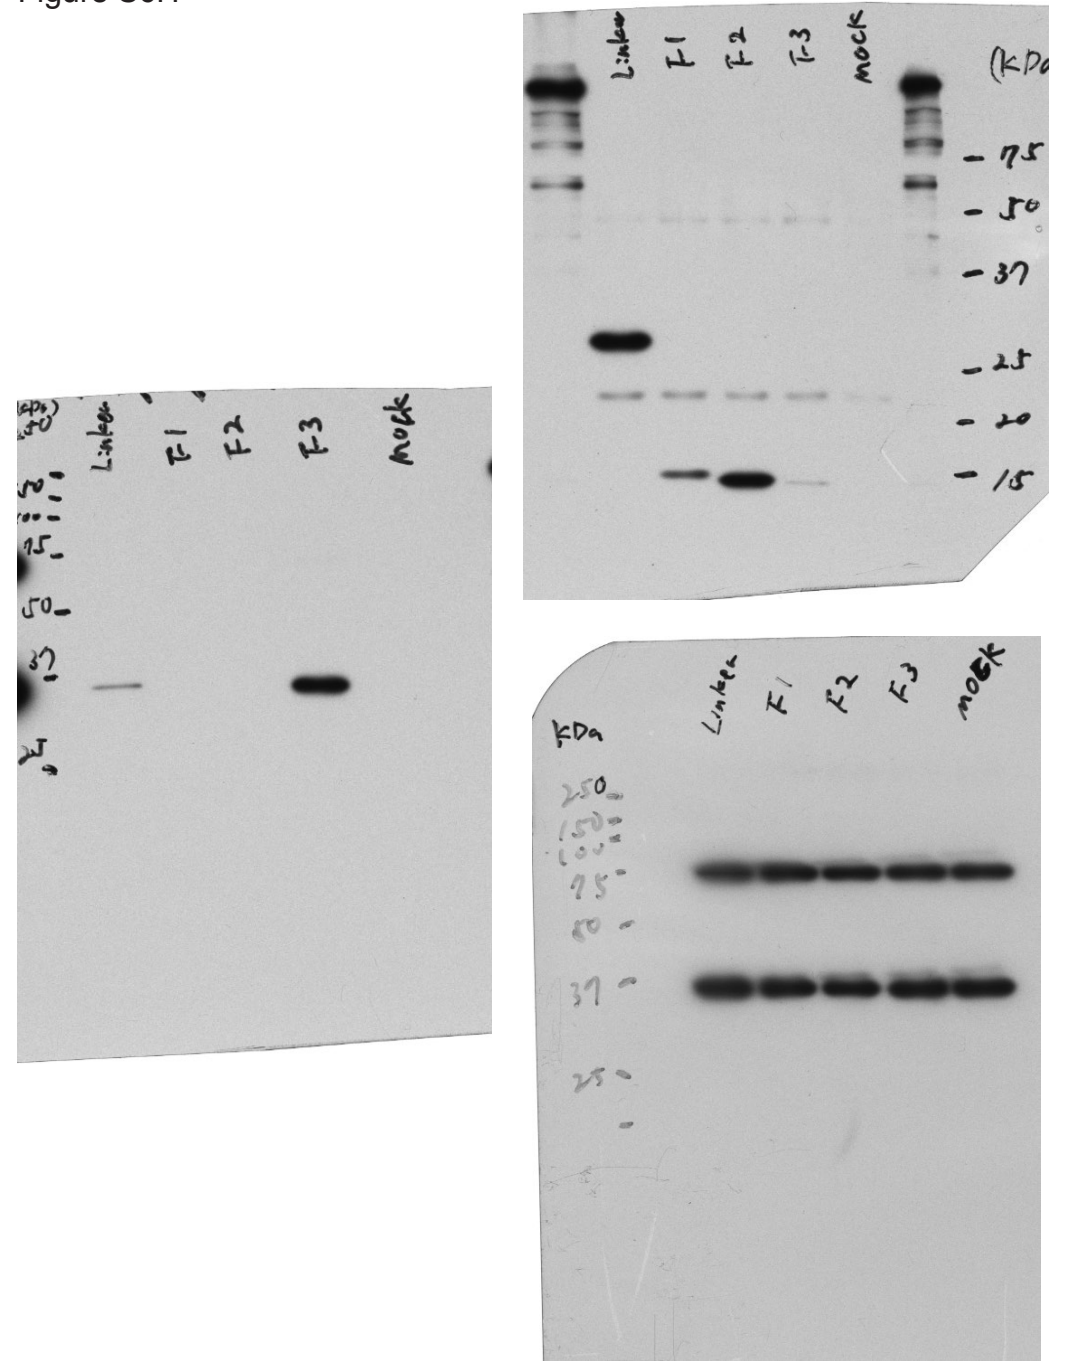

Supplement: NIHMS386142-supplement-9.pdf [file NIHMS386142-supplement-9.pdf]
